# Supplementary material
Source: Research Square preprint supplement (doi:10.21203/rs.3.rs-9151984/v1)
Supplement: Supplementary file 1 [file c963079a0cce249f8f5b6600.xlsx]

## Sheet: 1- IKs Sequence
Subunit	Aminoacids	Sequence
MinK WT	1-114	MILSNTTAVTPFLTKLWQETVQQGGNMSGLARRSPRSSDGKLEALYVLMVLGFFGFFTLGIMLSYIRSKKLEHSNDPFNVYIESDAWQEKDKAYVQARVLESYRSCYVVENHLA
KCNQ1	90-403 (314)	RVSIYSTRRPVLARTHVQGRVYNFLERPTGWKCFVYHFAVFLIVLVCLIFSVLSTIEQYAALATGTLFWMEIVLVVFFGTEYVVRLWSAGCRSKYVGLWGRLRFARKPISIIDLIVVVASMVVLCVGSKGQVFATSAIRGIRFLQILRMLHVDRQGGTWRLLGSVVFIHRQELITTLYIGFLGLIFSSYFVYLAEKDAVNESGRVEFGSYADALWWGVVTVTTIGYGDKVPQTWVGKTIASCFSVFAISFFALPAGILGSGFALKVQQKQRQKHFNRQIPAAASLIQTAWRCYAAENPDSSTWKIYIRKAPRSH

## Sheet: 2- IKs Data
				NOT MINIMIZED ΔG									MINIMIZED ΔG
			Seed Number	IKs ΔG (Kcal/mol)	IKs iPTM	IKs PTM	Kv7.1 PAE	Kv7.1 pLDDT	MinK PAE	KCNE1 pDDLT	Global PAE	Global pLDDT	IKs ΔΔG (Kcal/mol)	IKs ΔG (Kcal/mol)	Interaction energy (Kcal/mol) Kv7.1/MinK	Interaction ΔΔG (Kcal/mol) Kv7.1/MinK	IKs RSMD vs Cui C, et al.-WT (Å)	IKs RSMD vs Zhong L, et al.-WT (Å)	IKs RSMD vs AF-IKs WT (Å)	IKs RSMD vs AF IKs Homo (Å)	MolProbity Score	Clash Score	Ramachandran Favoured (%)	Ramachandran Outliers (%)	Rotamer Outliers (%)
	IKs_WT_AF1		1496597789	477.32	0.72	0.73	14.3471	74.1035	22.2409	54.0877	17.9922	68.7766	NA	-328.31	-346.63	NA	1.511	2.849	NA	NA	0.97	0.33	99.35	0	2.88
	IKs_WT_AF2		804034603	551.04	0.71	0.72	14.7182	73.7276	22.5135	53.1603	18.3178	68.2334	NA	-206.15	-309.88	NA	1.374	2.853	NA	NA	0.94	0.76	97.64	0.47	1.44
	IKs_WT_AF3		2089220372	452.17	0.73	0.74	14.1553	74.2913	21.588	55.4518	17.5875	69.2783	NA	-346.03	-347.58	NA	1.475	2.944	NA	NA	0.95	0.47	98.58	0.18	2.4
	IKs_WT_AF4		1000229102	567.34	0.72	0.74	14.1164	74.6622	21.6461	55.4602	17.5934	69.5327	NA	-290.38	-342.6	NA	1.57	2.992	NA	NA	0.85	0.14	99.17	0.24	2.4
	IKs_WT_AF5		1180275864	413.79	0.71	0.72	14.4707	74.2174	22.9682	52.2409	18.3945	68.3639	NA	-289.56	-240.7	NA	1.581	2.871	NA	NA	0.89	0.25	99.12	0.12	2.47
	IKs_WT_AF6		1077277728	593.45	0.71	0.73	14.4966	73.7348	22.4977	53.1571	18.1912	68.2378	NA	-225.58	-342.64	NA	1.65	2.819	NA	NA	1.3	0.94	96.7	0.35	2.54
	IKs_WT_AF7		1187413525	536.68	0.72	0.73	14.4286	74.2639	22.1485	53.6927	17.9934	68.7686	NA	-195.9	-308.53	NA	1.349	2.612	NA	NA	0.82	0.4	98.17	0.18	1.72
	IKs_WT_AF8		1437294157	461.88	0.73	0.75	14.1592	74.6235	21.523	55.5161	17.5595	69.5193	NA	-316.22	-335.09	NA	1.424	2.688	NA	NA	0.94	0.43	99	0.06	2.4
	IKs_WT_AF9		366356703	419.75	0.7	0.72	14.7826	73.2407	22.9796	53.1648	18.5677	67.8777	NA	-297.18	-333.34	NA	1.628	2.882	NA	NA	0.9	0.47	98.53	0.35	2.06
	IKs_WT_AF10		285310378	615.24	0.7	0.72	14.7395	74.174	23.0934	53.0929	18.597	68.5425	NA	-213.22	-269.91	NA	1.341	2.66	NA	NA	1	0.65	99.29	0.06	2.4
	IKs_WT_AF11		1558668391	556.58	0.69	0.71	15.0865	73.4638	23.4111	51.9925	18.9305	67.7281	NA	-259.54	-325.5	NA	1.349	2.878	NA	NA	1.08	0.69	99.06	0	2.95
	IKs_WT_AF12		1080780482	540.25	0.7	0.72	14.8076	73.8582	22.5357	53.997	18.3762	68.5526	NA	-203.33	-311.37	NA	1.32	2.6	NA	NA	1.13	0.8	99.17	0.06	3.16
	IKs_WT_AF13		118694709	435.96	0.71	0.73	14.2775	74.4167	22.366	54.7487	18.0125	69.1627	NA	-318.38	-333.83	NA	1.456	2.778	NA	NA	0.97	0.51	98.94	0	2.47
	IKs_WT_AF14		1054461164	577.26	0.71	0.73	14.5676	73.9581	22.0919	53.2896	18.042	68.4368	NA	-231.84	-296.2	NA	1.379	2.683	NA	NA	1	0.36	99.17	0	3.09
	IKs_WT_AF15		435954295	460.59	0.72	0.74	14.1556	74.4491	21.7813	54.7177	17.6769	69.1782	NA	-296.05	-321.18	NA	1.58	2.847	NA	NA	0.99	0.54	99.47	0	2.54
	IKs_WT_AF16		1216339072	415.87	0.7	0.72	14.7483	73.6154	23.011	52.1549	18.5637	67.8826	NA	-370.64	-323.44	NA	1.449	2.839	NA	NA	1.19	0.83	99.35	0	3.71
	IKs_WT_AF17		1285833036	456.86	0.73	0.75	13.9417	75.0119	21.5562	55.3234	17.4578	69.7524	NA	-268.72	-315.91	NA	1.47	2.894	NA	NA	0.97	0.07	97.52	0.06	2.82
	IKs_WT_AF18		225997250	491.25	0.72	0.74	14.4826	74.1617	21.9324	54.6114	17.9227	68.9392	NA	-255.55	-309.05	NA	1.375	3.034	NA	NA	0.94	0.51	98.88	0	2.27
	IKs_WT_AF19		467809209	502.18	0.74	0.75	13.9862	75.0543	20.9018	57.205	17.1796	70.2861	NA	-250.22	-313.04	NA	1.318	2.959	NA	NA	1.24	0.9	99.12	0.06	4.05
	IKs_WT_AF20		717631342	457.83	0.7	0.72	14.6212	73.7862	23.178	52.1239	18.5724	67.9995	NA	-299.55	-268.73	NA	1.593	2.795	NA	NA	0.99	0.11	99.47	0	3.91
			Averages	512.999	0.7135	0.7305	14.4544	74.1407	22.2982	53.9594	18.0764	68.7525		-273.118	-314.757	NA	1.47071	2.82385	NA	NA	0.982857	0.529286	98.715	0.147857	2.43143
	IKs_A8VHet_AF1		1496597789	561.48	0.66	0.68	15.5298	70.4764	25.3559	45.5797	20.0672	63.8203	64.63	-263.68	-316.57	30.06	NA	NA	0.766	0.319	1.04	0.69	99	0.8	2.61
	IKs_A8VHet_AF2		804034603	513.54	0.66	0.69	15.0091	71.6242	25.2534	46.8798	19.7396	65.0089	-88.07	-294.22	-244.24	65.64	NA	NA	0.386	0.735	1.16	0.98	98.82	0	3.09
	IKs_A8VHet_AF3		2089220372	573.83	0.66	0.69	15.3047	70.6362	25.1265	45.507	19.8401	63.918	111.97	-234.06	-303.85	43.73	NA	NA	0.699	0.728	0.93	0.69	98.35	0	1.85
	IKs_A8VHet_AF4		1000229102	551.08	0.66	0.69	15.0831	71.603	25.2616	45.6915	19.7832	64.6757	89.02	-201.36	-231.95	110.65	NA	NA	0.716	0.888	1.12	1.05	98.64	0.18	2.61
	IKs_A8VHet_AF5		1180275864	529.38	0.67	0.69	14.8895	72.161	25.1188	46.5516	19.613	65.3144	83.41	-206.15	-252.06	-11.36	NA	NA	0.765	0.653	1.07	1.08	98.64	0.18	2.19
	IKs_A8VHet_AF6		1077277728	577.67	0.66	0.68	15.4018	70.3048	25.2023	45.8694	19.9273	63.7721	-6.22	-231.8	-335.81	6.83	NA	NA	0.819	0.797	1.01	0.9	98.35	0.35	2.06
	IKs_A8VHet_AF7		1187413525	587.55	0.67	0.69	14.9417	71.7674	25.1843	45.4998	19.6714	64.7449	4.59	-191.31	-277.97	30.56	NA	NA	0.402	0.646	1.19	1.12	98.76	0.59	3.09
	IKs_A8VHet_AF8		1437294157	598.37	0.67	0.7	14.7418	72.1887	24.9178	46.6432	19.4407	65.3592	93.38	-222.84	-332.89	2.2	NA	NA	0.624	0.391	1.1	0.58	97.52	0.41	2.54
	IKs_A8VHet_AF9		366356703	499.34	0.66	0.69	14.7826	73.2407	25.4244	45.7112	19.9292	63.9783	-13.12	-310.3	-240.82	92.52	NA	NA	0.798	0.22	1.12	1.12	99	0	2.47
	IKs_A8VHet_AF10		285310378	566.47	0.67	0.69	14.9502	72.0969	25.157	45.6848	19.6633	65.0357	-45.83	-259.05	-295.34	-25.43	NA	NA	0.141	0.186	1.09	0.72	99.12	0.35	2.95
	IKs_A8VHet_AF11		1558668391	585.29	0.67	0.69	15.0865	73.4638	25.0206	46.5835	19.7179	64.6005	8.02	-251.52	-306.28	19.22	NA	NA	0.289	0.772	0.91	0.69	99.29	0.06	1.78
	IKs_A8VHet_AF12		1080780482	571.83	0.66	0.69	15.3324	71.2897	25.3759	44.9535	19.9701	64.2488	4.26	-199.07	-255.42	55.95	NA	NA	0.337	0.335	0.84	0.61	99.12	0	1.51
	IKs_A8VHet_AF13		118694709	495.44	0.66	0.69	15.0867	71.6188	25.1834	46.7133	19.749	64.9604	44.88	-273.5	-318.75	15.08	NA	NA	0.741	0.272	1.18	1.37	98.76	0	2.61
	IKs_A8VHet_AF14		1054461164	673.33	0.67	0.69	15.1606	70.8026	25.207	46.5202	19.7997	64.3108	58.46	-173.38	-290.39	5.81	NA	NA	0.298	0.612	1.32	1.08	96.82	0.29	2.61
	IKs_A8VHet_AF15		435954295	665.79	0.67	0.69	14.8413	72.3039	25.2443	46.1418	19.645	65.3095	109.36	-186.69	-268.6	52.58	NA	NA	0.802	0.682	1.07	0.83	99.53	0.24	2.54
	IKs_A8VHet_AF16		1216339072	579.07	0.66	0.68	15.4606	70.5623	25.1587	46.356	19.9389	64.0908	106.35	-264.29	-316.62	6.82	NA	NA	0.694	0.835	1.16	1.08	99.17	0	2.88
	IKs_A8VHet_AF17		1285833036	538.86	0.67	0.7	14.8065	72.5048	25.138	46.228	19.5772	65.4798	61.93	-206.79	-273.04	42.87	NA	NA	0.729	0.91	0.98	0.58	99	0.24	2.4
	IKs_A8VHet_AF18		225997250	504.17	0.67	0.69	14.8993	71.1401	25.1914	44.4641	19.6518	64.0083	-38.04	-293.59	-287.04	22.01	NA	NA	0.697	0.591	0.99	0.61	97.82	0.12	2.13
	IKs_A8VHet_AF19		467809209	533.76	0.66	0.69	15.0042	71.5136	25.4913	45.4873	19.8468	64.5555	-0.57	-250.79	-245.01	68.03	NA	NA	0.368	0.357	1.07	0.83	98.94	0.24	2.61
	IKs_A8VHet_AF20		717631342	468.83	0.66	0.68	15.3376	70.9462	25.3076	47.0024	19.9414	64.5449	48.39	-251.16	-249.21	19.52	NA	NA	0.788	0.959	0.9	0.87	98.29	0	1.51
			Averages	558.754	0.6645	0.689	15.0825	71.6123	25.216	46.0034	19.7756	64.5868	34.84	-238.278	-282.093	32.6645			0.59295	0.5944	1.0625	0.874	98.647	0.2025	2.402
	IKs_A8VHomo_AF1		1496597789	527.85	0.69	0.71	15.2536	72.5349	23.4536	51.0718	19.0401	66.7922	77.56	-250.75	-321.71	24.92	NA	NA	0.74	NA	0.99	0.87	98.94	0.24	1.99
	IKs_A8VHomo_AF2		804034603	522.58	0.7	0.72	14.6111	73.9229	22.7909	53.6472	18.3883	68.4979	-83.79	-289.94	-322.59	-12.71	NA	NA	0.766	NA	1.06	0.47	99.17	0	3.29
	IKs_A8VHomo_AF3		2089220372	438.36	0.7	0.72	14.6818	73.519	22.7564	53.0212	18.4104	68.0346	4.08	-341.95	-318.04	29.54	NA	NA	0.494	NA	0.8	0.22	99.12	0.18	1.92
	IKs_A8VHomo_AF4		1000229102	443.89	0.72	0.74	13.9801	75.2128	21.8506	54.5528	17.6144	69.685	-37.32	-327.7	-355.03	-12.43	NA	NA	0.38	NA	0.85	0.25	99.06	0	2.19
	IKs_A8VHomo_AF5		1180275864	506.18	0.72	0.74	14.1366	74.5181	21.9665	53.9098	17.7522	69.0042	69.31	-220.25	-321.68	-80.98	NA	NA	0.267	NA	0.96	0.33	98.29	0.41	2.81
	IKs_A8VHomo_AF6		1077277728	599.95	0.7	0.72	14.762	73.0943	23.2042	51.9154	18.6603	67.4277	12.34	-213.24	-320.08	22.56	NA	NA	0.08	NA	1.25	0.72	97.05	0.18	2.88
	IKs_A8VHomo_AF7		1187413525	477.16	0.71	0.73	14.4485	74.0641	22.6845	52.9388	18.2516	68.4134	-56.77	-252.67	-313.51	-4.98	NA	NA	0.591	NA	0.97	0.36	98.64	0	2.81
	IKs_A8VHomo_AF8		1437294157	536.54	0.7	0.72	14.8393	74.0222	23.1929	51.8441	18.6967	68.0883	72.57	-243.65	-282.85	52.24	NA	NA	0.62	NA	1.02	0.69	98.82	0.29	2.47
	IKs_A8VHomo_AF9		366356703	508.12	0.69	0.71	15.1372	72.5975	23.1647	50.3953	18.844	66.6571	58.69	-238.49	-259.01	74.33	NA	NA	0.688	NA	1.13	1.23	98.64	0.47	2.4
	IKs_A8VHomo_AF10		285310378	523.63	0.71	0.73	14.8166	73.5089	22.1884	54.0081	18.2206	68.2912	-16.18	-229.4	-312.83	-42.92	NA	NA	0.183	NA	1.06	0.72	98.64	0	2.67
	IKs_A8VHomo_AF11		1558668391	511.26	0.7	0.72	14.877	73.0067	23.1954	51.636	18.7181	67.2887	5.38	-254.16	-303.61	21.89	NA	NA	0.747	NA	1.01	0.51	98.7	0.29	2.74
	IKs_A8VHomo_AF12		1080780482	533.62	0.69	0.71	15.0933	73.1629	23.1227	52.5316	18.801	67.6428	-42.23	-245.56	-302.97	8.4	NA	NA	0.279	NA	1.08	0.58	99.12	0.12	3.22
	IKs_A8VHomo_AF13		118694709	490.17	0.72	0.73	14.5436	74.3339	21.7336	55.0285	17.8637	69.1685	46.56	-271.82	-317.79	16.04	NA	NA	0.742	NA	0.91	0.51	98.76	0.06	2.05
	IKs_A8VHomo_AF14		1054461164	583.07	0.72	0.74	14.2722	74.1014	21.5664	55.7472	17.6404	69.1905	-11.46	-243.3	-343.43	-47.23	NA	NA	0.712	NA	1.45	0.9	96.05	0.06	3.42
	IKs_A8VHomo_AF15		435954295	528.38	0.73	0.74	14.164	74.5489	21.7715	55.5093	17.6769	69.4546	-26	-239.22	-336.77	-15.59	NA	NA	0.321	NA	1.01	0.47	98	0.47	2.88
	IKs_A8VHomo_AF16		1216339072	477.95	0.71	0.72	14.8103	73.3627	22.5794	53.8482	18.3978	68.1414	27.42	-343.22	-331.35	-7.91	NA	NA	0.258	NA	1.11	0.83	99.12	0	2.95
	IKs_A8VHomo_AF17		1285833036	425.62	0.73	0.74	13.9783	74.9545	21.5886	55.1179	17.4925	69.6484	-8.6	-277.32	-320.31	-4.4	NA	NA	0.293	NA	0.89	0.36	99.71	0	2.19
	IKs_A8VHomo_AF18		225997250	509.35	0.69	0.71	15.0974	73.0245	22.9431	51.9953	18.7203	67.3979	-2.08	-257.63	-306.1	2.95	NA	NA	0.452	NA	1	0.79	98.53	0.06	2.12
	IKs_A8VHomo_AF19		467809209	609.35	0.69	0.71	14.8671	73.6469	23.4213	51.2875	18.8171	67.6644	49.36	-200.86	-237.38	75.66	NA	NA	0.224	NA	1.07	0.65	98.64	0.06	2.95
	IKs_A8VHomo_AF20		717631342	572.22	0.7	0.72	14.6793	73.5952	22.9204	52.5464	18.4848	67.9634	55.71	-243.84	-317.15	-48.42	NA	NA	0.288	NA	0.97	0.25	97.64	0.53	2.47
			Averages	516.263	0.706	0.724	14.6525	73.7366	22.6048	53.1276	18.3246	68.2226	9.7275	-259.249	-312.21	2.548	NA	NA	0.45625		1.0295	0.5855	98.532	0.171	2.621
				IKs ΔG (Kcal/mol)	IKs iPTM	IKs PTM	Kv7.1 PAE	Kv7.1 pLDDT	MinK PAE	KCNE1 pDDLT	Global PAE	Global pLDDT	IKs ΔΔG (Kcal/mol)	IKs ΔG (Kcal/mol)	Interaction energy (Kcal/mol) Kv7.1/MinK	Interaction ΔΔG (Kcal/mol) Kv7.1/MinK	IKs RSMD vs Cui C, et al.-WT (Å)	IKs RSMD vs Zhong L, et al.-WT (Å)	IKs RSMD vs AF-IKs WT (Å)	IKs RSMD vs AF-IKs Homo (Å)
				SEM
			WT	14.1286	0.00292674	0.0026631	0.0691745	0.108033	0.151428	0.314428	0.104087	0.155745	NA	11.2457	6.29744	NA	0.0273547	0.0273348	NA	NA
			Heterozygous	11.6431	0.00114133	0.00123544	0.0535115	0.196938	0.029796	0.149536	0.0352643	0.123977	12.8285	8.7613	7.3483	7.65252	NA	NA	0.0487285	0.0550764
			Homozygous	11.2147	0.0030262	0.00255467	0.0857875	0.165724	0.145235	0.35078	0.108786	0.203294	10.3698	8.8614	6.02037	8.93069	NA	NA	0.0503658	NA
				Median
			WT	484.285	0.71	0.73	14.4766	74.1678	22.3035	53.8448	18.0273	68.6606	NA	-279.14	-318.545	NA	1.456	2.848	NA	NA
			Heterozygous	563.975	0.66	0.69	15.0461	71.6109	25.1969	46.0056	19.7661	64.578	46.635	-242.425	-282.505	26.035	NA	NA	0.698	0.6495
			Homozygous	516.92	0.7	0.72	14.7219	73.6211	22.7736	52.98	18.4041	68.1148	4.73	-248.155	-317.915	-0.725	NA	NA	0.416	NA

## Sheet: 3- Statistics
				Statistical analysis summary
S	Statistically significant
NS	Statistically non significant
			Interpretation	Comparison	Results
				Kv7.1 PAE
			S	WT Vs Heterozygous	Paired-t test indicated a significant difference between WT (M = 14.5 ,SD = 0.3) and Heterozygous (M = 15.1 ,SD = 0.2), t(19) = 8.2, p < .001.
			S	WT Vs Homozygous	Paired-t test indicated a significant difference between WT (M = 14.5 ,SD = 0.3) and Homozygous (M = 14.7 ,SD = 0.4), t(19) = 2.4, p = 0.026.
			S	Homozygous Vs Heterozygous	Paired-t test indicated a significant difference between Homozygous (M = 15.1 ,SD = 0.2) and Heterozygous (M = 14.7 ,SD = 0.4), t(19) = 5, p < .001.
				Kv7.1 pDDLT
			S	WT Vs Heterozygous	The Wilcoxon Signed-Rank test indicated a significant difference between WT (Median = 74.2 ,n = 20) and Heterozygous (Median = 71.6 ,n = 20), W+ = 0, p < .001, r = -1.1.
			S	WT Vs Homozygous	Paired-t test indicated a significant difference between WT (M = 74.1 ,SD = 0.5) and homozygous (M = 73.7 ,SD = 0.7), t(19) = 3.2, p = .005.
			S	Homozygous Vs Heterozygous	The Wilcoxon Signed-Rank test indicated a significant difference between Homozygous (Median = 71.6 ,n = 20) and Heterozygous (Median = 73.6 ,n = 20), W+ = 207, p < .001, r = 1.
				MinK PAE
			S	WT Vs Heterozygous	Paired-t test indicated a significant difference between WT (M = 22.3 ,SD = 0.7) and Heterozygous (M = 25.2 ,SD = 0.1), t(19) = 18.6, p < .001.
			NS	WT Vs Homozygous	Paired-t test indicated a non-significant difference between WT (M = 22.3 ,SD = 0.7) and Homozygous (M = 22.6 ,SD = 0.6), t(19) = 1.5, p = .142.
			NS	Homozygous Vs Heterozygous	Paired-t test indicated a non-significant difference between Homozygous (M = 135.2 ,SD = 492) and Heterozygous (M = 22.6 ,SD = 0.6), t(19) = 1, p = .319.
				MinK pDDLT
			S	WT Vs Heterozygous	Paired-t test indicated a significant difference between WT (M = 54 ,SD = 1.4) and Heterizygous (M = 46 ,SD = 0.7), t(19) = 20.1, p < .001.
			NS	WT Vs Homozygous	Paired-t test indicated a non-significant difference between WT (M = 54 ,SD = 1.4) and Homozygous (M = 53.1 ,SD = 1.6), t(19) = 1.8, p = .091.
			S	Homozygous Vs Heterozygous	Paired-t test indicated a significant difference between Homozygous (M = 46 ,SD = 0.7) and Heterozygous (M = 53.1 ,SD = 1.6), t(19) = 21.6, p < .001.
				Global PAE
			S	WT Vs Heterozygous	Paired-t test indicated a significant difference between WT (M = 18.1 ,SD = 0.5) and Heterozygous (M = 19.8 ,SD = 0.2), t(19) = 17, p < .001.
			NS	WT Vs Homozygous	Paired-t test indicated a non-significant difference between WT (M = 18.1 ,SD = 0.5) and Homozygous (M = 18.3 ,SD = 0.5), t(19) = 1.9, p = .074.
			S	Homo Vs Heterozygous	Paired-t test indicated a significant difference between Homozygous (M = 19.8 ,SD = 0.2) and Heterozygous (M = 18.3 ,SD = 0.5), t(19) = 14.8, p < .001.
				Global pDDLT
			S	WT Vs Heterozygous	Paired-t test indicated a significant difference between WT (M = 68.8 ,SD = 0.7) and Heterozygous (M = 64.6 ,SD = 0.6), t(19) = 25.5, p < .001.
			S	WT Vs Homozygous	Paired-t test indicated a significant difference between WT (M = 68.8 ,SD = 0.7) and Homozygous (M = 68.2 ,SD = 0.9), t(19) = 2.6, p = .017.
			S	Homozygous Vs Heterozygous	Paired-t test indicated a significant difference between Homozygous (M = 64.6 ,SD = 0.6) and Heterozygous (M = 68.2 ,SD = 0.9), t(19) = 24.5, p < .001.
				IKs ΔΔG (Kcal/mol)
			NS	WT-Het/WT-Homo	Paired-t test indicated a non-significant difference between WT/Heterozygous (M = 34.8 ,SD = 57.4) and WT/Homozygous (M = 9.7 ,SD = 46.4), t(19) = 1.9, p = .073.
			NS	WT-Het/Het-Homo	Paired-t test indicated a non-significant difference between WT/Heterozygous (M = 34.8 ,SD = 57.4) and Heterozygous/Homozygous (M = 21 ,SD = 53.6), t(19) = 1.3, p = .200.
			NS	WT-Homo/Het-Homo	Paired-t test indicated a non-significant difference between WT/Homozygous (M = 9.7 ,SD = 46.4) and Heterozygous/Homozygous (M = 21 ,SD = 53.6), t(19) = 0.6, p = .557.
				IKs ΔG (Kcal/mol)
			S	WT Vs Heterozygous	Paired-t test indicated a significant difference between WT (M = -273.1 ,SD = 50.3) and Heterozygous (M = -238.3 ,SD = 39.2), t(19) = 2.7, p = .014.
			NS	WT Vs Homozygous	Paired-t test indicated a non-significant difference between WT (M = -273.1 ,SD = 50.3) and Homozygous (M = -259.2 ,SD = 39.6), t(19) = 1.3, p = .200.
			NS	Homozygous Vs Heterozygous	Paired-t test indicated a non-significant difference between Homozygous (M = -238.3 ,SD = 39.2) and Heterozygous (M = -259.2 ,SD = 39.6), t(19) = 1.7, p = .096.
				Interaction ΔG (Kcal/mol)
			S	WT Vs Heterozygous	Paired-t test indicated a significant large difference between WT (M = -314.8 ,SD = 28.2) and Heterozygous (M = -282.1 ,SD = 32.9), t(19) = 4.3, p < .001.
			NS	WT Vs Homozygous	Paired-t test indicated a non-significant difference between WT (M = -314.8 ,SD = 28.2) and Homozygous (M = -312.2 ,SD = 26.9), t(19) = 0.3, p = .778.
			S	Homozygous Vs Heterozygous	Paired-t test indicated a significant difference between Homozygous (M = -282.1 ,SD = 32.9) and Heterozygous (M = -312.2 ,SD = 26.9), t(19) = 3.4, p = .003.
				Interaction ΔΔG (Kcal/mol)
			S	WT-Het/WT-Homo	Paired-t test indicated a significant difference between WT/Heterozygous (M = -32.7 ,SD = 34.2) and WT/Homozygous (M = -2.5 ,SD = 39.9), t(19) = 3.4, p = .003.
			S	WT-Het/Het-Homo	Paired-t test indicated a significant difference between WT/Heterozygous (M = -32.7 ,SD = 34.2) and Heterozygous/Homozygous (M = 30.1 ,SD = 39.8), t(19) = 4.5, p < .001.
			S	WT-Homo/Het-Homo	Paired-t test indicated a significant large difference between WT/Homozygous (M = -2.5 ,SD = 39.9) and Heterozygous/Homozygous (M = 30.1 ,SD = 39.8), t(19) = 4.3, p < .001.
				RSMD (Å)
			NS	WT Vs Het/WT Vs Hom	Paired-t test indicated a non-significant difference between WT Vs Heterozygous (M = 0.6 ,SD = 0.2) and WT Vs Homozygous (M = 0.5 ,SD = 0.2), t(19) = 1.8, p = .081.
			NS	WT Vs Hom/Homo Vs Het	Paired-t test indicated a non-significant difference between WT Vs Homozygous (M = 0.6 ,SD = 0.2) and Homozygous Vs Heterozygous (M = 0.6 ,SD = 0.2), t(19) = 0.02, p = .982.
			NS	Homo Vs Het/WT Vs Homo	Paired-t test indicated a non-significant difference between Homozygous Vs Heterozygous (M = 0.5 ,SD = 0.2) and WT Vs Homozygous (M = 0.6 ,SD = 0.2), t(19) = 1.7, p = .112.
				iPTM
			S	WT Vs Heterozygous	Paired-t test indicated a significant difference between WT (M = 0.7 ,SD = 0.01) and Heterozygous (M = 0.7 ,SD = 0.005), t(19) = 16, p < .001.
			NS	WT Vs Homozygous	The Wilcoxon Signed-Rank test indicated a non-significant difference between WT (Median = 0.7 ,n = 20) and Homozygous (Median = 0.7 ,n = 20), Z = -1.5, p = .132, r = -0.4.
			S	Homozygous Vs Heterozygous	The Wilcoxon Signed-Rank test indicated a significant difference between Homozygous (Median = 0.7 ,n = 20) and Heterozygous (Median = 0.7 ,n = 20), Z = 3.9, p < .001, r = 0.9.
				PTM
			S	WT Vs Heterozygous	The Wilcoxon Signed-Rank test indicated a significant difference between WT (Median = 0.7 ,n = 20) and Heterozygous (Median = 0.7 ,n = 20), Z = -3.9, p < .001, r = -0.9.
			NS	WT Vs Homozygous	Paired-t test indicated a non-significant difference between WT (M = 0.7 ,SD = 0.01) and Homozygous (M = 0.7 ,SD = 0.01), t(19) = 1.9, p = .073.
			S	Homozygous Vs Heterozygous	The Wilcoxon Signed-Rank test indicated a significant difference between Homozygous (Median = 0.7 ,n = 20) and Heterozygous (Median = 0.7 ,n = 20), Z = 3.9, p < .001, r = 0.9.

## Sheet: 4- Normality
			Shapiro-Wilk Test								Shapiro-Wilk Test							Shapiro-Wilk Test
[NN]	Non normal distribution
[N]	Normal distribution			Kv7.1 PAE			Diferences				IKs ΔΔG (Kcal/mol)			Diferences				IKs RSMD (Å)			Diferences
			Seed	WT	A8V Heterozygous	A8V Homozygous	WT - A8V Heterozygous [N]	WT - A8V Homozygous [N]	Heterozygous - Homozygous [N]		WT -Heterozygous	WT-Homozygous	Heterozygous-Homozygous	WT - A8V Heterozygous [N]	WT - A8V Homozygous [N]	Heterozygous - Homozygous [N]		WT -Heterozygous	WT-Homozygous	Heterozygous-Homozygous	WT - A8V Heterozygous [N]	WT - A8V Homozygous [N]	Heterozygous - Homozygous [N]
			1	14.3471	15.5298	15.2536	-1.18267	-0.906512	0.276154		64.63	77.56	-12.93	-12.93	77.56	90.49		0.766	0.74	0.319	0.026	0.447	0.421
			2	14.7182	15.0091	14.6111	-0.29087	0.107116	0.397986		-88.07	-83.79	-4.28	-4.28	-83.79	-79.51		0.386	0.766	0.735	-0.38	-0.349	0.031
			3	14.1553	15.3047	14.6818	-1.14944	-0.526544	0.622894		111.97	4.08	107.89	107.89	4.08	-103.81		0.699	0.494	0.728	0.205	-0.029	-0.234
			4	14.1164	15.0831	13.9801	-0.966704	0.136302	1.10301		89.02	-37.32	126.34	126.34	-37.32	-163.66		0.716	0.38	0.888	0.336	-0.172	-0.508
			5	14.4707	14.8895	14.1366	-0.418807	0.334082	0.75289		83.41	69.31	14.1	14.1	69.31	55.21		0.765	0.267	0.653	0.498	0.112	-0.386
			6	14.4966	15.4018	14.762	-0.905201	-0.26541	0.639791		-6.22	12.34	-18.56	-18.56	12.34	30.9		0.819	0.08	0.797	0.739	0.022	-0.717
			7	14.4286	14.9417	14.4485	-0.513085	-0.0199171	0.493168		4.59	-56.77	61.36	61.36	-56.77	-118.13		0.402	0.591	0.646	-0.189	-0.244	-0.055
			8	14.1592	14.7418	14.8393	-0.582567	-0.680088	-0.0975217		93.38	72.57	20.81	20.81	72.57	51.76		0.624	0.62	0.391	0.004	0.233	0.229
			9	14.7826	14.7826	15.1372	0	-0.35461	-0.35461		-13.12	58.69	-71.81	-71.81	58.69	130.5		0.798	0.688	0.22	0.11	0.578	0.468
			10	14.7395	14.9502	14.8166	-0.210739	-0.0770822	0.133657		-45.83	-16.18	-29.65	-29.65	-16.18	13.47		0.141	0.183	0.186	-0.042	-0.045	-0.003
			11	15.0865	15.0865	14.877	0	0.20951	0.20951		8.02	5.38	2.64	2.64	5.38	2.74		0.289	0.747	0.772	-0.458	-0.483	-0.025
			12	14.8076	15.3324	15.0933	-0.524889	-0.285789	0.2391		4.26	-42.23	46.49	46.49	-42.23	-88.72		0.337	0.279	0.335	0.058	0.002	-0.056
			13	14.2775	15.0867	14.5436	-0.809203	-0.266063	0.543141		44.88	46.56	-1.68	-1.68	46.56	48.24		0.741	0.742	0.272	-0.001	0.469	0.47
			14	14.5676	15.1606	14.2722	-0.593003	0.295371	0.888373		58.46	-11.46	69.92	69.92	-11.46	-81.38		0.298	0.712	0.612	-0.414	-0.314	0.1
			15	14.1556	14.8413	14.164	-0.685678	-0.00833635	0.677342		109.36	-26	52.53	135.36	56.83	-78.53		0.802	0.321	0.682	0.481	0.12	-0.361
			16	14.7483	15.4606	14.8103	-0.712374	-0.0620772	0.650296		106.35	27.42	78.93	78.93	27.42	-51.51		0.694	0.258	0.835	0.436	-0.141	-0.577
			17	13.9417	14.8065	13.9783	-0.864812	-0.0365637	0.828248		61.93	-8.6	70.53	70.53	-8.6	-79.13		0.729	0.293	0.91	0.436	-0.181	-0.617
			18	14.4826	14.8993	15.0974	-0.416715	-0.614852	-0.198137		-38.04	-2.08	-35.96	-35.96	-2.08	33.88		0.697	0.452	0.591	0.245	0.106	-0.139
			19	13.9862	15.0042	14.8671	-1.01804	-0.88099	0.137048		-0.57	49.36	-49.93	-49.93	49.36	99.29		0.368	0.224	0.357	0.144	0.011	-0.133
			20	14.6212	15.3376	14.6793	-0.716416	-0.0581433	0.658272		48.39	55.71	-7.32	-7.32	55.71	63.03		0.788	0.288	0.959	0.5	-0.171	-0.671
				Kv7.1 pLDDT			Diferences				IKs ΔG (Kcal/mol)			Diferences				IKs iPTM			Diferences
			Seed	WT	A8V Heterozygous	A8V Homozygous	WT - A8V Heterozygous [NN]	WT - A8V Homozygous [N]	Heterozygous - Homozygous [NN]		WT	A8V Heterozygous	A8V Homozygous	WT - A8V Heterozygous [N]	WT - A8V Homozygous [N]	Heterozygous - Homozygous [N]		WT	A8V Heterozygous	A8V Homozygous	WT - A8V Heterozygous [N]	WT - A8V Homozygous [NN]	Heterozygous - Homozygous [NN]
			1	74.1035	70.4764	72.5349	3.62712	1.56859	-2.05853		-328.31	-263.68	-250.75	-64.63	-77.56	-12.93		0.72	0.66	0.69	0.06	0.03	-0.03
			2	73.7276	71.6242	73.9229	2.1034	-0.195268	-2.29867		-206.15	-294.22	-289.94	88.07	83.79	-4.28		0.71	0.66	0.7	0.05	0.01	-0.04
			3	74.2913	70.6362	73.519	3.6551	0.772293	-2.8828		-346.03	-234.06	-341.95	-111.97	-4.08	107.89		0.73	0.66	0.7	0.07	0.03	-0.04
			4	74.6622	71.603	75.2128	3.05917	-0.550566	-3.60973		-290.38	-201.36	-327.7	-89.02	37.32	126.34		0.72	0.66	0.72	0.06	0	-0.06
			5	74.2174	72.161	74.5181	2.05644	-0.300696	-2.35713		-289.56	-206.15	-220.25	-83.41	-69.31	14.1		0.71	0.67	0.72	0.04	-0.01	-0.05
			6	73.7348	70.3048	73.0943	3.42995	0.64047	-2.78948		-225.58	-231.8	-213.24	6.22	-12.34	-18.56		0.71	0.66	0.7	0.05	0.01	-0.04
			7	74.2639	71.7674	74.0641	2.49643	0.199746	-2.29668		-195.9	-191.31	-252.67	-4.59	56.77	61.36		0.72	0.67	0.71	0.05	0.01	-0.04
			8	74.6235	72.1887	74.0222	2.43476	0.601257	-1.8335		-316.22	-222.84	-243.65	-93.38	-72.57	20.81		0.73	0.67	0.7	0.06	0.03	-0.03
			9	73.2407	73.2407	72.5975	0	0.643199	0.643199		-297.18	-310.3	-238.49	13.12	-58.69	-71.81		0.7	0.66	0.69	0.04	0.01	-0.03
			10	74.174	72.0969	73.5089	2.07702	0.665113	-1.41191		-213.22	-259.05	-229.4	45.83	16.18	-29.65		0.7	0.67	0.71	0.03	-0.01	-0.04
			11	73.4638	73.4638	73.0067	0	0.457122	0.457122		-259.54	-251.52	-254.16	-8.02	-5.38	2.64		0.69	0.67	0.7	0.02	-0.01	-0.03
			12	73.8582	71.2897	73.1629	2.56853	0.69527	-1.87326		-203.33	-199.07	-245.56	-4.26	42.23	46.49		0.7	0.66	0.69	0.04	0.01	-0.03
			13	74.4167	71.6188	74.3339	2.7979	0.0828402	-2.71506		-318.38	-273.5	-271.82	-44.88	-46.56	-1.68		0.71	0.66	0.72	0.05	-0.01	-0.06
			14	73.9581	70.8026	74.1014	3.15545	-0.143304	-3.29876		-231.84	-173.38	-243.3	-58.46	11.46	69.92		0.71	0.67	0.72	0.04	-0.01	-0.05
			15	74.4491	72.3039	74.5489	2.14525	-0.0997344	-2.24499		-296.05	-186.69	-239.22	-109.36	-56.83	52.53		0.72	0.67	0.73	0.05	-0.01	-0.06
			16	73.6154	70.5623	73.3627	3.05312	0.252759	-2.80036		-370.64	-264.29	-343.22	-106.35	-27.42	78.93		0.7	0.66	0.71	0.04	-0.01	-0.05
			17	75.0119	72.5048	74.9545	2.50704	0.057398	-2.44964		-268.72	-206.79	-277.32	-61.93	8.6	70.53		0.73	0.67	0.73	0.06	0	-0.06
			18	74.1617	71.1401	73.0245	3.02163	1.13724	-1.88439		-255.55	-293.59	-257.63	38.04	2.08	-35.96		0.72	0.67	0.69	0.05	0.03	-0.02
			19	75.0543	71.5136	73.6469	3.54068	1.40733	-2.13335		-250.22	-250.79	-200.86	0.57	-49.36	-49.93		0.74	0.66	0.69	0.08	0.05	-0.03
			20	73.7862	70.9462	73.5952	2.83992	0.190928	-2.649		-299.55	-251.16	-243.84	-48.39	-55.71	-7.32		0.7	0.66	0.7	0.04	0	-0.04
				MinK PAE			Diferences				IKs interaction energy Kv7.1/MinK (Kcal/mol)			Diferences				IKs PTM			Diferences
			Seed	WT	A8V Heterozygous	A8V Homozygous	WT - A8V Heterozygous [N]	WT - A8V Homozygous [N]	Heterozygous - Homozygous [N]		WT	A8V Heterozygous	A8V Homozygous	WT - A8V Heterozygous [N]	WT - A8V Homozygous [N]	Heterozygous - Homozygous [N]		WT	A8V Heterozygous	A8V Homozygous	WT - A8V Heterozygous [NN]	WT - A8V Homozygous [N]	Heterozygous - Homozygous [NN]
			1	22.2409	25.3559	23.4536	-3.11501	-1.21269	1.90232		-346.63	-316.57	-321.71	-30.06	-24.92	5.14		0.73	0.68	0.71	0.05	0.02	-0.03
			2	22.5135	25.2534	22.7909	-2.73987	-0.277363	2.46251		-309.88	-244.24	-322.59	-65.64	12.71	78.35		0.72	0.69	0.72	0.03	0	-0.03
			3	21.588	25.1265	22.7564	-3.53848	-1.16833	2.37015		-347.58	-303.85	-318.04	-43.73	-29.54	14.19		0.74	0.69	0.72	0.05	0.02	-0.03
			4	21.6461	25.2616	21.8506	-3.61545	-0.204454	3.411		-342.6	-231.95	-355.03	-110.65	12.43	123.08		0.74	0.69	0.74	0.05	0	-0.05
			5	22.9682	25.1188	21.9665	-2.15063	1.0017	3.15233		-240.7	-252.06	-321.68	11.36	80.98	69.62		0.72	0.69	0.74	0.03	-0.02	-0.05
			6	22.4977	25.2023	23.2042	-2.70464	-0.706544	1.99809		-342.64	-335.81	-320.08	-6.83	-22.56	-15.73		0.73	0.68	0.72	0.05	0.01	-0.04
			7	22.1485	25.1843	22.6845	-3.03578	-0.53598	2.4998		-308.53	-277.97	-313.51	-30.56	4.98	35.54		0.73	0.69	0.73	0.04	0	-0.04
			8	21.523	24.9178	23.1929	-3.39486	-1.66998	1.72488		-335.09	-332.89	-282.85	-2.2	-52.24	-50.04		0.75	0.7	0.72	0.05	0.03	-0.02
			9	22.9796	25.4244	23.1647	-2.44483	-0.185117	2.25972		-333.34	-240.82	-259.01	-92.52	-74.33	18.19		0.72	0.69	0.71	0.03	0.01	-0.02
			10	23.0934	25.157	22.1884	-2.06357	0.905035	2.96861		-269.91	-295.34	-312.83	25.43	42.92	17.49		0.72	0.69	0.73	0.03	-0.01	-0.04
			11	23.4111	25.0206	23.1954	-1.6095	0.215752	1.82525		-325.5	-306.28	-303.61	-19.22	-21.89	-2.67		0.71	0.69	0.72	0.02	-0.01	-0.03
			12	22.5357	25.3759	23.1227	-2.84013	-0.587004	2.25313		-311.37	-255.42	-302.97	-55.95	-8.4	47.55		0.72	0.69	0.71	0.03	0.01	-0.02
			13	22.366	25.1834	21.7336	-2.8174	0.632385	3.44979		-333.83	-318.75	-317.79	-15.08	-16.04	-0.96		0.73	0.69	0.73	0.04	0	-0.04
			14	22.0919	25.207	21.5664	-3.11513	0.525512	3.64065		-296.2	-290.39	-343.43	-5.81	47.23	53.04		0.73	0.69	0.74	0.04	-0.01	-0.05
			15	21.7813	25.2443	21.7715	-3.46297	0.0097935	3.47276		-321.18	-268.6	-336.77	-52.58	15.59	68.17		0.74	0.69	0.74	0.05	0	-0.05
			16	23.011	25.1587	22.5794	-2.14765	0.431639	2.57929		-323.44	-316.62	-331.35	-6.82	7.91	14.73		0.72	0.68	0.72	0.04	0	-0.04
			17	21.5562	25.138	21.5886	-3.5818	-0.0324285	3.54938		-315.91	-273.04	-320.31	-42.87	4.4	47.27		0.75	0.7	0.74	0.05	0.01	-0.04
			18	21.9324	25.1914	22.9431	-3.25895	-1.01067	2.24827		-309.05	-287.04	-306.1	-22.01	-2.95	19.06		0.74	0.69	0.71	0.05	0.03	-0.02
			19	20.9018	25.4913	23.4213	-4.58948	-2.51943	2.07004		-313.04	-245.01	-237.38	-68.03	-75.66	-7.63		0.75	0.69	0.71	0.06	0.04	-0.02
			20	23.178	25.3076	22.9204	-2.12961	0.257619	2.38723		-268.73	-249.21	-317.15	-19.52	48.42	67.94		0.72	0.68	0.72	0.04	0	-0.04
				MinK pLDDT			Diferences				IKs interaction ΔΔG Kv7.1/MinK (Kcal/mol)			Diferences
			Seed	WT	A8V Heterozygous	A8V Homozygous	WT - A8V Heterozygous [N]	WT - A8V Homozygous [N]	Heterozygous - Homozygous [N]		WT -Heterozygous	WT-Homozygous	Heterozygous-Homozygous	WT - A8V Heterozygous [N]	WT - A8V Homozygous [N]	Heterozygous - Homozygous [N]
			1	54.0877	45.5797	51.0718	8.50799	3.01594	-5.49205		-30.06	-24.92	5.14	-5.14	-35.2	-30.06
			2	53.1603	46.8798	53.6472	6.28049	-0.486859	-6.76735		-65.64	12.71	78.35	-78.35	-143.99	-65.64
			3	55.4518	45.507	53.0212	9.94473	2.43059	-7.51413		-43.73	-29.54	14.19	-14.19	-57.92	-43.73
			4	55.4602	45.6915	54.5528	9.7686	0.907329	-8.86128		-110.65	12.43	123.08	-123.08	-233.73	-110.65
			5	52.2409	46.5516	53.9098	5.68936	-1.66884	-7.3582		11.36	80.98	69.62	-69.62	-58.26	11.36
			6	53.1571	45.8694	51.9154	7.28778	1.24173	-6.04605		-6.83	-22.56	-15.73	15.73	8.9	-6.83
			7	53.6927	45.4998	52.9388	8.19287	0.753843	-7.43903		-30.56	4.98	35.54	-35.54	-66.1	-30.56
			8	55.5161	46.6432	51.8441	8.87288	3.67197	-5.20091		-2.2	-52.24	-50.04	50.04	47.84	-2.2
			9	53.1648	45.7112	50.3953	7.45365	2.76951	-4.68414		-92.52	-74.33	18.19	-18.19	-110.71	-92.52
			10	53.0929	45.6848	54.0081	7.40811	-0.915173	-8.32328		25.43	42.92	17.49	-17.49	7.94	25.43
			11	51.9925	46.5835	51.636	5.40904	0.356501	-5.05254		-19.22	-21.89	-2.67	2.67	-16.55	-19.22
			12	53.997	44.9535	52.5316	9.04351	1.46536	-7.57815		-55.95	-8.4	47.55	-47.55	-103.5	-55.95
			13	54.7487	46.7133	55.0285	8.03533	-0.279826	-8.31515		-15.08	-16.04	-0.96	0.96	-14.12	-15.08
			14	53.2896	46.5202	55.7472	6.76944	-2.45759	-9.22702		-5.81	47.23	53.04	-53.04	-58.85	-5.81
			15	54.7177	46.1418	55.5093	8.57586	-0.79156	-9.36742		-52.58	15.59	68.17	-68.17	-120.75	-52.58
			16	52.1549	46.356	53.8482	5.79886	-1.69329	-7.49215		-6.82	7.91	14.73	-14.73	-21.55	-6.82
			17	55.3234	46.228	55.1179	9.09539	0.205476	-8.88991		-42.87	4.4	47.27	-47.27	-90.14	-42.87
			18	54.6114	44.4641	51.9953	10.1473	2.6161	-7.53123		-22.01	-2.95	19.06	-19.06	-41.07	-22.01
			19	57.205	45.4873	51.2875	11.7176	5.91742	-5.8002		-68.03	-75.66	-7.63	7.63	-60.4	-68.03
			20	52.1239	47.0024	52.5464	5.12154	-0.422516	-5.54405		-19.52	48.42	67.94	-67.94	-87.46	-19.52
				Global PAE			Diferences
			Seed	WT	A8V Heterozygous	A8V Homozygous	WT - A8V Heterozygous [N]	WT - A8V Homozygous [N]	Heterozygous - Homozygous [N]
			1	17.9922	20.0672	19.0401	-2.07496	-1.04789	1.02706
			2	18.3178	19.7396	18.3883	-1.42173	-0.0704228	1.35131
			3	17.5875	19.8401	18.4104	-2.25261	-0.822898	1.42971
			4	17.5934	19.7832	17.6144	-2.1898	-0.0210474	2.16876
			5	18.3945	19.613	17.7522	-1.2185	0.642366	1.86087
			6	18.1912	19.9273	18.6603	-1.73612	-0.46911	1.26701
			7	17.9934	19.6714	18.2516	-1.67798	-0.258217	1.41976
			8	17.5595	19.4407	18.6967	-1.88119	-1.13718	0.744002
			9	18.5677	19.9292	18.844	-1.36148	-0.276344	1.08514
			10	18.597	19.6633	18.2206	-1.06631	0.376425	1.44274
			11	18.9305	19.7179	18.7181	-0.787415	0.212393	0.999808
			12	18.3762	19.9701	18.801	-1.59399	-0.424879	1.16911
			13	18.0125	19.749	17.8637	-1.73652	0.148809	1.88533
			14	18.042	19.7997	17.6404	-1.75763	0.401642	2.15928
			15	17.6769	19.645	17.6769	-1.96813	3.538e-05	1.96817
			16	18.5637	19.9389	18.3978	-1.37514	0.165904	1.54104
			17	17.4578	19.5772	17.4925	-2.11942	-0.0346542	2.08477
			18	17.9227	19.6518	18.7203	-1.72916	-0.797628	0.93153
			19	17.1796	19.8468	18.8171	-2.6672	-1.63757	1.02964
			20	18.5724	19.9414	18.4848	-1.36898	0.0876647	1.45664
				Global pLDDT			Diferences
			Seed	WT	A8V Heterozygous	A8V Homozygous	WT - A8V Heterozygous [N]	WT - A8V Homozygous [N]	Heterozygous - Homozygous [N]
			1	68.7766	63.8203	66.7922	4.9563	1.98442	-2.97189
			2	68.2334	65.0089	68.4979	3.22453	-0.2645	-3.48903
			3	69.2783	63.918	68.0346	5.3603	1.2437	-4.1166
			4	69.5327	64.6757	69.685	4.85702	-0.152288	-5.0093
			5	68.3639	65.3144	69.0042	3.04953	-0.640216	-3.68975
			6	68.2378	63.7721	67.4277	4.46573	0.810134	-3.65559
			7	68.7686	64.7449	68.4134	4.02375	0.355249	-3.6685
			8	69.5193	65.3592	68.0883	4.16006	1.43102	-2.72903
			9	67.8777	63.9783	66.6571	3.89941	1.22069	-2.67872
			10	68.5425	65.0357	68.2912	3.50677	0.251297	-3.25548
			11	67.7281	64.6005	67.2887	3.12755	0.439372	-2.68817
			12	68.5526	64.2488	67.6428	4.30384	0.9098	-3.39404
			13	69.1627	64.9604	69.1685	4.20231	-0.00579263	-4.20811
			14	68.4368	64.3108	69.1905	4.12606	-0.753684	-4.87974
			15	69.1782	65.3095	69.4546	3.86867	-0.27641	-4.14508
			16	67.8826	64.0908	68.1414	3.79177	-0.258758	-4.05053
			17	69.7524	65.4798	69.6484	4.27262	0.103983	-4.16864
			18	68.9392	64.0083	67.3979	4.93084	1.54128	-3.38956
			19	70.2861	64.5555	67.6644	5.73057	2.62168	-3.10889
			20	67.9995	64.5449	67.9634	3.45453	0.0360489	-3.41849
